# Supplementary material for: Van der Waals heterostructure of graphene and germanane: tuning the ohmic contact by electrostatic gating and mechanical strain
Source: Royal Society of Chemistry journal article supplement (doi:10.1039/d1cp03632g), 2021-01-01
Supplement: d1cp03632g1.pdf [file d1cp03632g1.pdf]

## Supplementary Information

### **Van der Waals heterostructure of graphene and Germanane: Tuning the ohmic contact by electrostatic gating and mechanical strain**

A. Bafekry,<sup>1, \*</sup> S. Karbasizadeh,<sup>2</sup> M. Fara ji,<sup>3</sup> A. Bagheri Khatibani,<sup>4</sup>  
I. Abdolhosseini Sarsari,<sup>2</sup> D. Gogova,<sup>5</sup> and M. Ghergherehchi<sup>6</sup>,

<sup>1</sup>Department of Radiation Application, Shahid Beheshti University, 19839 69411 Tehran, Iran

<sup>2</sup>Department of Physics, Isfahan University of Technology, Isfahan, 84156-83111, Iran

<sup>3</sup>Micro and Nanotechnology Graduate Program, TOBB University of Economics and Technology, Sogutozu Caddesi No 43 Sogutozu, 06560, Ankara, Turkey

<sup>4</sup>Nano Research Lab, Lahijan Branch, Islamic Azad University, Lahijan, Iran

<sup>5</sup>Department of Physics, Chemistry and Biology, Linkoping University, 58183 Linkoping, Sweden

<sup>6</sup>Department of Electrical and Computer Engineering, Sungkyunkwan University, 16419 Suwon, Korea

*Email: bafekry.asad@gmail.com*

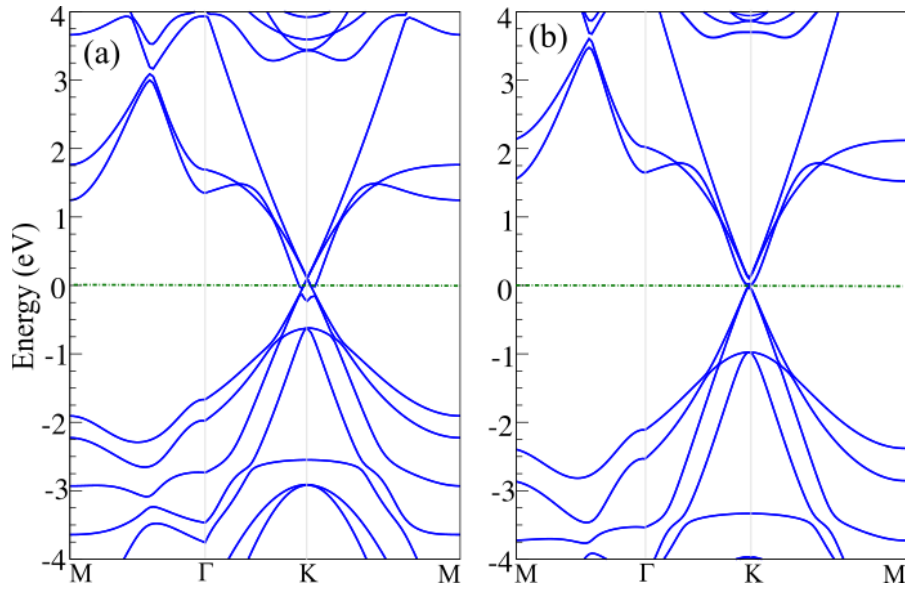

FigS1. Electronic band structure of GeH/Gr HTS with considering (a) PBE and (b) HSE06 functionals. Zero is set to Fermi-level.

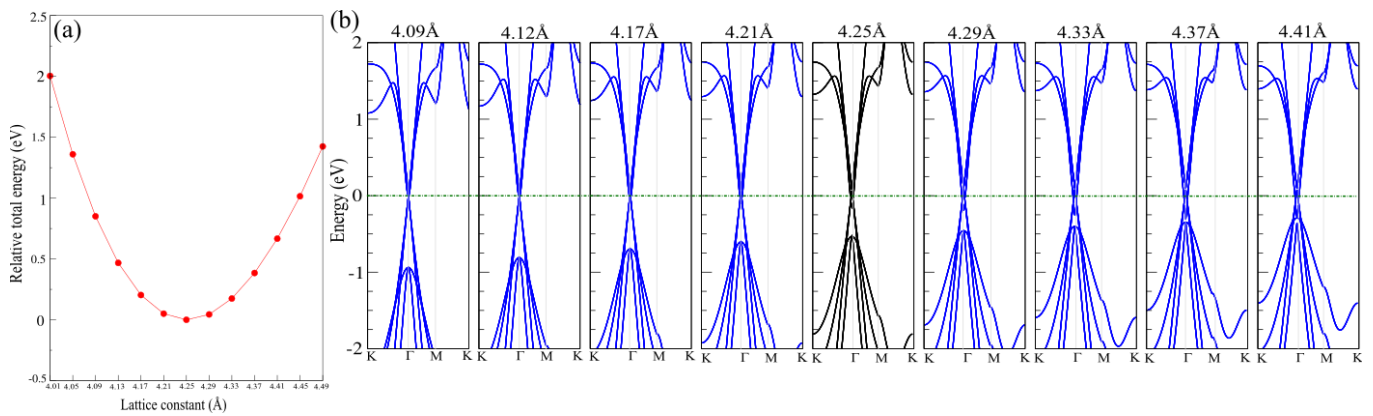

Fig. S2. (a) relative total energies for different lattice constants. (b) Band structures of the GeH/Gr HTS with varying lattice constants. This figure shows that changing the constant, whether it is increasing or decreasing it compared to the most stable value, has small to zero effects on the bands .of the HTS
